# Supplementary material for: Effect of Smoking Reduction Therapy on Smoking Cessation for Smokers without an Intention to Quit: An Updated Systematic Review and Meta-Analysis of Randomized Controlled Trials
Source: Int J Environ Res Public Health. 2015 Aug 25;12(9):10235–53. doi: 10.3390/ijerph120910235 (PMC4586609; doi:10.3390/ijerph120910235)
Supplement: Supplementary File 1 [file ijerph-12-10235-s001.pdf]

# Effect of Smoking Reduction Therapy on Smoking Cessation for Smokers without an Intention to Quit: An Updated Systematic Review and Meta-Analysis of Randomized Controlled Trials

---

## 1. Search Strategy

Source: PubMed

Searched on: April 24th, 2015

((tobacco reduction [title/abstract]) OR (cigarette\* reduction [title/abstract]) OR (reduce smoking [title/abstract]) OR (smoking reduction [title/abstract])) AND ((unwilling to) OR ("not willing") OR (no inten\*) OR ("not ready") OR ("not interest\*") OR (uninterest\*) OR (unmotivated)) AND ((randomized [tiab]) OR (trial\* [tiab/ pt]) OR (randomly [tiab]) OR (controlled clinical trial [pt]))

### 1.1. Source: Embase

Searched on: April 24th, 2015

Search Query

- #1 'tobacco reduction'
- #2 'cigarette reduction'
- #3 'reduce smoking'
- #4 'smoking reduction'
- #5 'unwilling to'
- #6 'not willing'
- #7 'no intention'
- #8 'not ready'
- #9 'not interested'
- #10 uninterested
- #11 unmotivated
- #12 #1 OR #2 OR #3 OR #4
- #13 #5 OR #6 OR #7 OR #8 OR #9 OR #10 OR #11
- #14 #12 AND #13 AND 'trial'

### 1.2. Source: Cochrane Central Register of Controlled Trials

Searched on: April 24th, 2015

("tobacco reduction" OR "cigarette\* reduction" OR "reduce smoking" OR "smoking reduction") AND ("unwilling to" OR "not willing" OR "no inten\*" OR "not ready" OR "not interest\*" OR uninterest\* OR unmotivated) AND trial\*

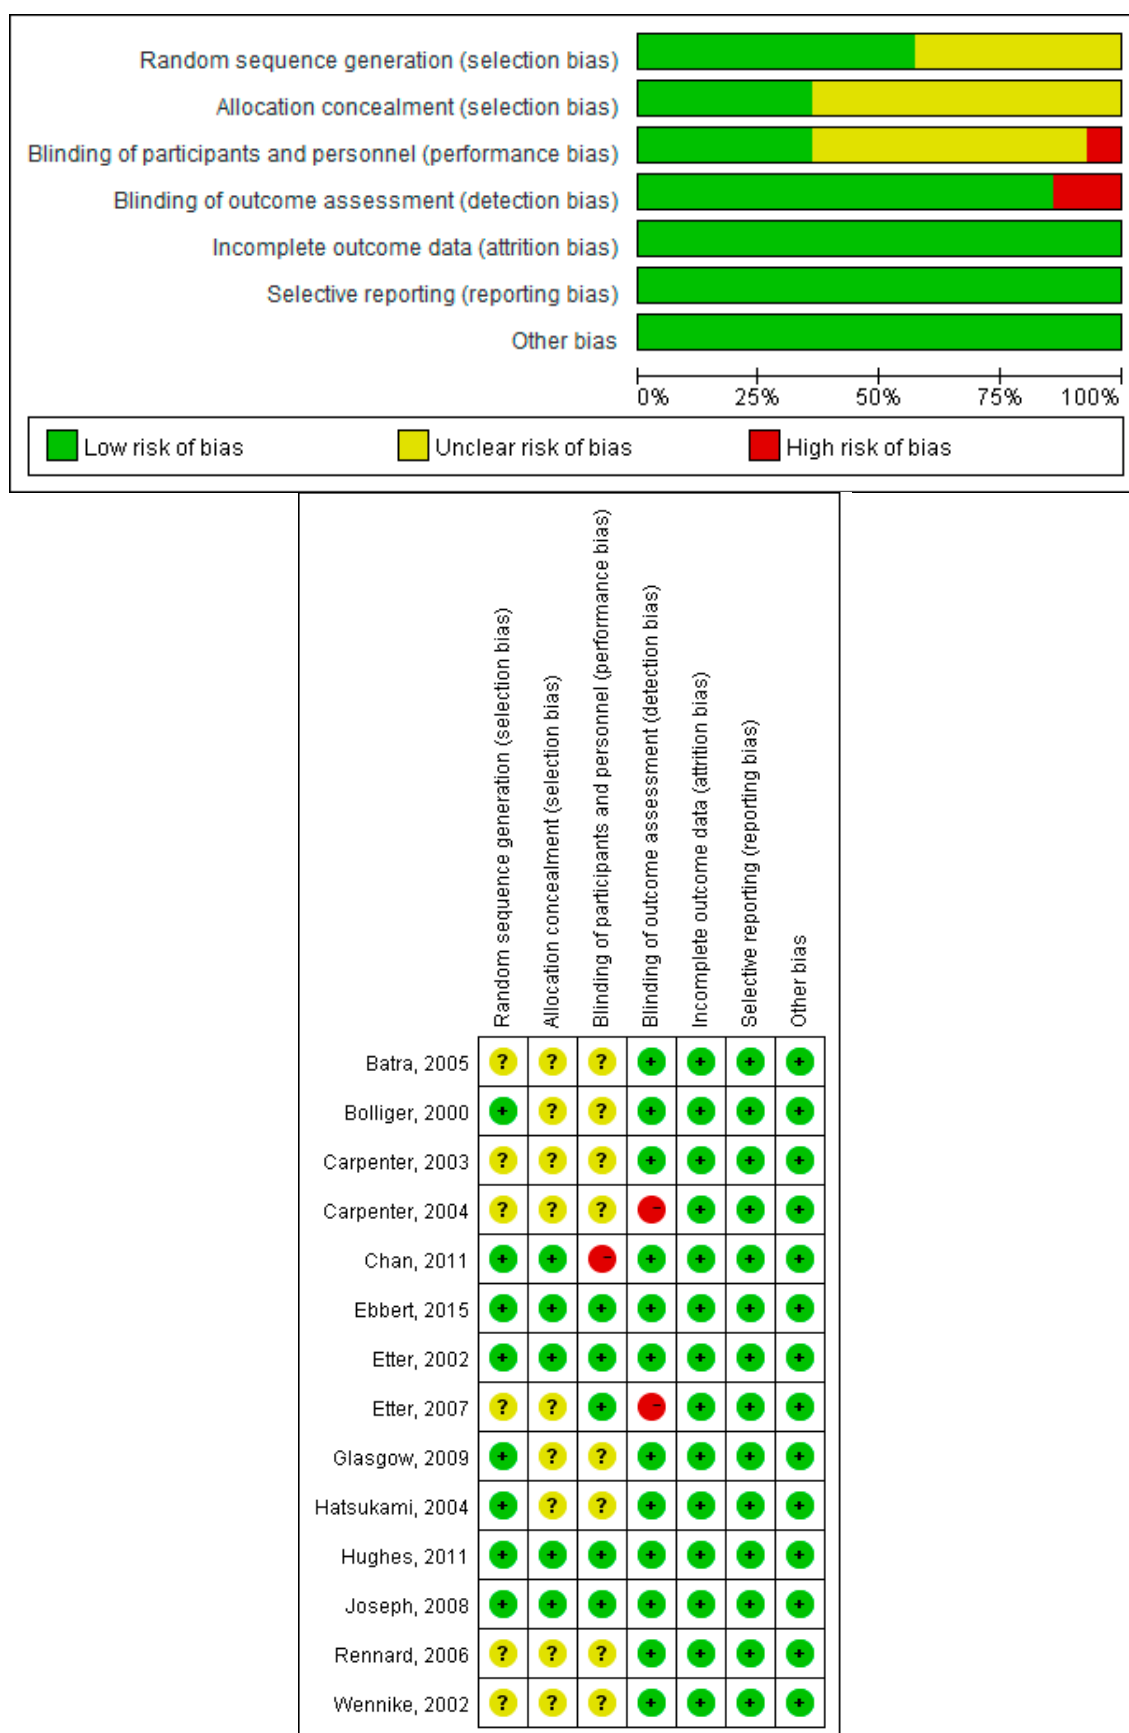

**Figure S1.** Risk of bias in the meta-analysis.

**Table S1.** Sensitivity analyses of the included trials.

| <b>Treat</b>                                                         | <b>No. Smokers</b> | <b>No. Trials</b> | <b>Treat /Total</b> | <b>Control /Total</b> | <b>RR (95% CI)</b> | <b>p Value</b> | <b>I<sup>2</sup>, %</b> | <b>p Value for Heterogeneity</b> |
|----------------------------------------------------------------------|--------------------|-------------------|---------------------|-----------------------|--------------------|----------------|-------------------------|----------------------------------|
| <b>Reduction support plus NRT vs. reduction support plus placebo</b> |                    |                   |                     |                       |                    |                |                         |                                  |
| All included trials [18,19,23,24,30,31]                              | 2356               | 6                 | 111/1176            | 59/1180               | 1.94 (1.26–3.00)   | 0.003          | 45                      | 0.11                             |
| Large sample size (n > 400) [23,24,30,31]                            | 1592               | 4                 | 70/792              | 35/800                | 2.14 (1.15–3.97)   | 0.02           | 54                      | 0.09                             |
| Multiple center [18,19,30]                                           | 1193               | 3                 | 58/599              | 27/594                | 2.40 (1.02–5.63)   | 0.05           | 66                      | 0.01                             |
| Carbon monoxide-confirmed quit rates [18,19,30,31]                   | 1604               | 4                 | 77/804              | 34/800                | 2.39 (1.29–4.43)   | 0.005          | 53                      | 0.09                             |
| Sustained abstinence [23,24]                                         | 752                | 2                 | 34/372              | 25/380                | 1.39 (0.83–2.33)   | 0.21           | 5                       | 0.31                             |
| Provided only self-help reduction materials [23,24]                  | 752                | 2                 | 34/372              | 25/380                | 1.39 (0.83–2.33)   | 0.21           | 5                       | 0.31                             |
| <b>Reduction support plus NRT vs. no intervention</b>                |                    |                   |                     |                       |                    |                |                         |                                  |
| All included trials [21–24,29]                                       | 3033               | 5                 | 150/1748            | 56/1285               | 1.93 (1.41–2.64)   | <0.001         | 46                      | 0.11                             |
| Large sample size (n > 400) [21–24]                                  | 2881               | 4                 | 141/1670            | 47/1211               | 2.11 (1.50–2.97)   | <0.001         | 37                      | 0.19                             |
| Healthy population [21–24]                                           | 2881               | 4                 | 141/1670            | 47/1211               | 2.11 (1.50–2.97)   | <0.001         | 37                      | 0.19                             |
| Carbon monoxide-confirmed quit rates [22]                            | 1154               | 1                 | 74/928              | 10/226                | 1.08 (0.95–3.43)   | 0.07           | -                       | -                                |
| Sustained abstinence [23,24]                                         | 1408               | 2                 | 30/530              | 28/778                | 1.57 (0.95–2.60)   | 0.08           | 0                       | 0.94                             |

NRT, nicotine replacement therapy.
